# Supplementary material
Source: PubMed Central journal article supplement (PMC8012280)
Supplement: ajcd0011-0093-f4.pdf [file ajcd0011-0093-f4.pdf]

## Efficacy and safety of CQ and HCQ for treating COVID-19 patients

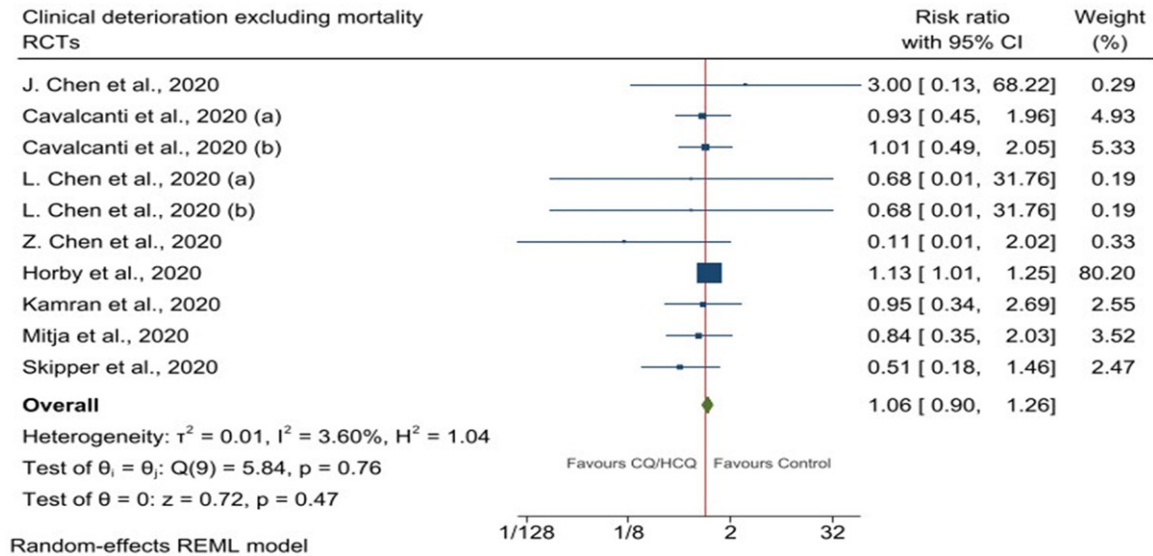

**Supplementary Figure 1.** Forest plot showing risk ratios for Clinical deterioration excluding mortality in patients randomized to CQ/HCQ vs Control (Usual care). Legend: L. Chen et al., 2020 (a) represents the trials arm CQ vs Control; L. Chen et al., 2020 (b) represents the trials arm HCQ vs Control; Cavalcanti et al., 2020 (a) represents the trials arm HCQ vs Control; Cavalcanti et al., 2020 (a) represents the trials arm HCQ+ZAM vs Control.

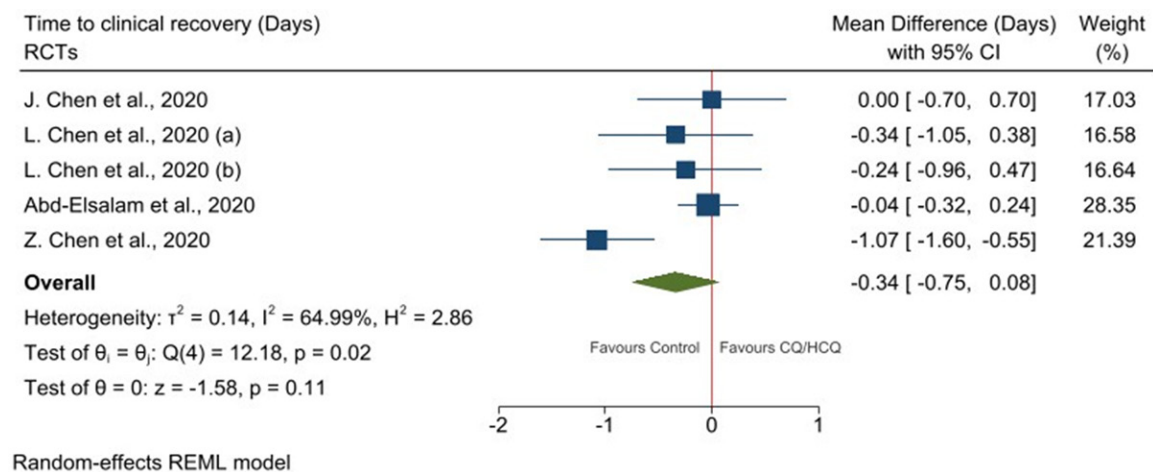

**Supplementary Figure 2.** Forest plot showing mean difference in time to clinical recovery in patients randomized to CQ/HCQ vs Control (Usual care). Legend: L. Chen et al., 2020 (a) represents the trials arm CQ vs Control; L. Chen et al., 2020 (b) represents the trials arm HCQ vs Control.

## Efficacy and safety of CQ and HCQ for treating COVID-19 patients

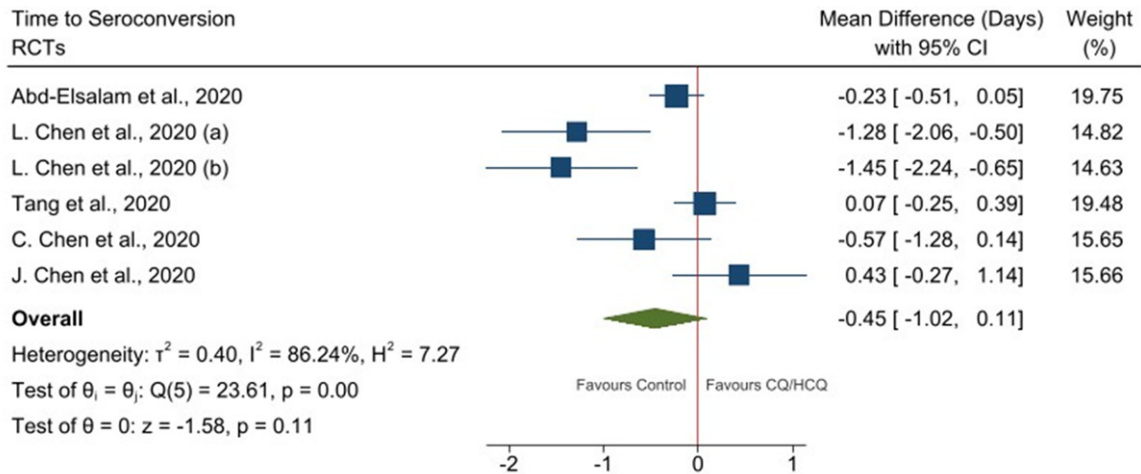

Random-effects REML model

**Supplementary Figure 3.** Forest plot showing mean difference in time to seroconversion (negative PCR) in patients randomized to CQ/HCQ vs Control (Usual care). Legend: L. Chen et al., 2020 (a) represents the trials arm CQ vs Control; L. Chen et al., 2020 (b) represents the trials arm HCQ vs Control.

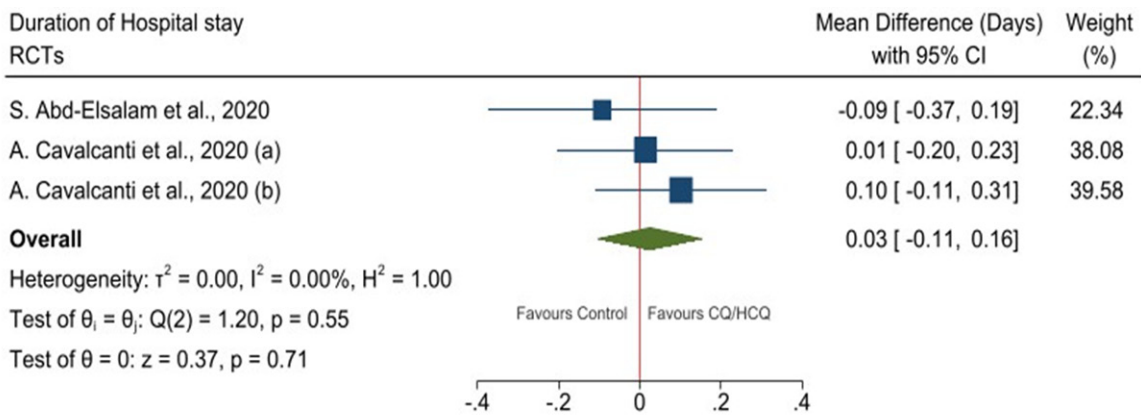

Random-effects REML model

**Supplementary Figure 4.** Forest plot showing mean difference in duration of hospital stay in patients randomized to CQ/HCQ vs Control (Usual care). Legend: Cavalcanti et al., 2020 (a) represents the trials arm HCQ vs Control; Cavalcanti et al., 2020 (b) represents the trials arm HCQ+ZAM vs Control.

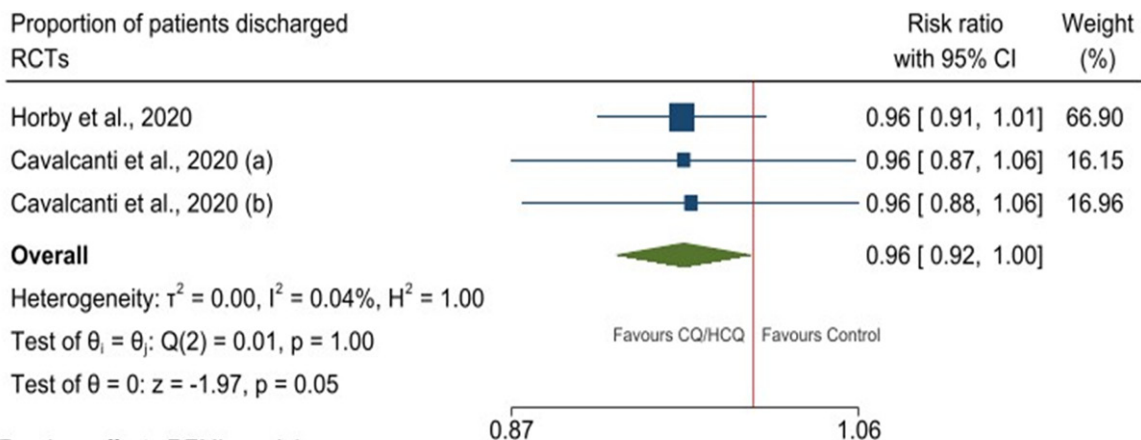

Random-effects REML model

## Efficacy and safety of CQ and HCQ for treating COVID-19 patients

**Supplementary Figure 5.** Forest plot showing risk ratio for being discharged at the end of the study period in patients randomized to CQ/HCQ vs Control (Usual care). Legend: Cavalcanti et al., 2020 (a) represents the trials arm HCQ vs Control; Cavalcanti et al., 2020 (a) represents the trials arm HCQ+ZAM vs Control.
